# Supplementary material for: Empirical Study of Overfitting in Deep Learning for Predicting Breast Cancer Metastasis
Source: Cancers (Basel). 2023 Mar 25;15(7):1969. doi: 10.3390/cancers15071969 (PMC10093528; doi:10.3390/cancers15071969)
Supplement: Supplementary file 1 [file cancers-15-01969-s001.zip › cancers-2270274-supplementary.pdf]

### Supplementary Table S1

The variables in the LSDS that are analyzed in the study presented here.

| Variables included             | Description                                | Values                                                                                            |
|--------------------------------|--------------------------------------------|---------------------------------------------------------------------------------------------------|
| <i>race</i>                    | race of patient                            | white, black, Asian, American Indian or Alaskan native, native Hawaiian or other pacific islander |
| <i>ethnicity</i>               | ethnicity of patient                       | not Hispanic, Hispanic                                                                            |
| <i>smoking</i>                 | smoking history of patient                 | ex smoker, non smoker, cigarettes, chewing tobacco, cigar                                         |
| <i>alcohol usage</i>           | alcohol usage of patient                   | moderate, no use, use but nos, former user, heavy user                                            |
| <i>family history</i>          | family history of cancer                   | cancer, no cancer, breast cancer, other cancer, cancer but nos                                    |
| <i>age_at_diagnosis</i>        | age at diagnosis of the disease            | 0-49, 50-69, >69                                                                                  |
| <i>menopausal_status</i>       | inferred menopausal status                 | pre, post                                                                                         |
| <i>side</i>                    | side of tumor                              | left, right                                                                                       |
| <i>TNEG</i>                    | patient ER, PR, and HER2 negative          | yes, no                                                                                           |
| <i>ER</i>                      | estrogen receptor expression               | neg, pos, low pos                                                                                 |
| <i>ER_percent</i>              | percent of cell stain pos for er receptors | 90-100, 0-20, 20-90                                                                               |
| <i>PR</i>                      | progesterone receptor expression           | neg, pos, low pos                                                                                 |
| <i>PR_percent</i>              | percent of cell stain pos for pr receptors | 90-100, 0-20, 20-90                                                                               |
| <i>P53</i>                     | whether P53 is mutated                     | neg, pos, low pos                                                                                 |
| <i>HER2</i>                    | HER2 expression                            | neg, pos                                                                                          |
| <i>t_tnm_stage</i>             | prime tumor stage in tnm system            | 0, 1,2,3,4, IS, 1mic, X                                                                           |
| <i>n_tnm_stage</i>             | # nearby cancerous lymph nodes             | 0,1,2,3,4,X                                                                                       |
| <i>stage</i>                   | composite of size and # positive nodes     | 0,1,2,3                                                                                           |
| <i>lymph_nodes_removed</i>     | number of lymph nodes removed              | 0-11, 12-22, > 22                                                                                 |
| <i>lymph_nodes_positive</i>    | number of positive lymph nodes             | 0, 1-8 >8                                                                                         |
| <i>lymph_node_status</i>       | patient had any positive lymph nodes       | neg,pos                                                                                           |
| <i>histology</i>               | tumor histology                            | lobular, duct                                                                                     |
| <i>size</i>                    | size of tumor in mm                        | 0-32, 32-70, >70                                                                                  |
| <i>grade</i>                   | grade of disease                           | 1, 2, 3                                                                                           |
| <i>invasive</i>                | whether tumor is invasive                  | yes,no                                                                                            |
| <i>histology2</i>              | tumor histology subtypes                   | IDC, DCIS, ILC, NC                                                                                |
| <i>invasive_tumor_location</i> | where invasive tumor is located            | mixed duct and lobular, duct, lobular, none                                                       |
| <i>DCIS_level</i>              | type of ductal carcinoma in situ           | solid, apocrine, cribriform, dcis, comedo, papillary, micropapillary                              |
| <i>re_excision</i>             | removal of an additional margin of tissue  | yes, no                                                                                           |
| <i>surgical_margins</i>        | whether residual tumor                     | res. tumor, no res. tumor, no primary site surgery                                                |
| <i>MRIs_60_surgery</i>         |                                            | yes, no                                                                                           |
